# Supplementary material for: Highly stretchable hybrid nanomembrane supercapacitors
Source: Royal Society of Chemistry journal article supplement (doi:10.1039/c6ra02757a), 2016-01-01
Supplement: c6ra02757a1.pdf [file c6ra02757a1.pdf]

Electronic Supplementary Material (ESI) for RSC Advances.

This journal is © The Royal Society of Chemistry

## Electronic Supplementary Information

### Highly stretchable hybrid nanomembrane supercapacitors

Keon Jung Kim<sup>a</sup>, Jae Ah Lee<sup>a,b</sup>, Márcio D. Lima<sup>b</sup>, Ray H. Baughman<sup>b</sup>, Seon Jeong Kim<sup>\*a</sup>

\*E-mail: [sjk@hanyang.ac.kr](mailto:sjk@hanyang.ac.kr)

#### Materials and method

##### Materials

Spinable aligned arrays of multi-walled carbon nanotubes forests were grown on a silicon wafer by the chemical vapour deposition method<sup>27</sup>. Iron(III) p-toluenesulfonate hexahydrate (Fe(III)PTS,  $M_w = 677.52$ ), pyridine (anhydrous, 99.8%), 1-butanol (for molecular biology,  $\geq 99\%$ ), and 3,4-ethylenedioxythiophene (EDOT) monomer (97%), poly(vinyl alcohol) (PVA) ( $M_w = 146,000, 186,000$ ), and LiCl ( $M_w = 42.39$ ) were purchased from Sigma-Aldrich (St. Louis, MO, USA). Ecoflex 0050 and Sil-Poxy were from Smooth-On.

##### Fabrication of hybrid nanomembranes

A 8 wt % Fe(III)PTS/butanol solution was used as an oxidizing agent. Pyridine (1.6 vol %) was added to the 8 wt % Fe(III)PTS/butanol solution. The oxidizing solutions were slowly flowed over two-layer CNS. The CNS were allowed to dry at 60 °C for 20 min to completely evaporate the solvent. The EDOT monomer was cast next to the densified CNS in a VPP chamber, and the samples were then exposed to EDOT vapor at 60 °C for 1 h. After polymerization, the samples were rinsed several times in ethanol to remove unreacted oxidant<sup>11</sup>.

##### Fabrication of stretchable supercapacitor electrodes

An Ecoflex rubber layer (2.6 cm × 2.6 cm, 1.25 mm thick) was fully stretched and then held to a homemade template (8.0 cm × 8.0 cm). The 15-layer CNS (width: ~2.1 cm) to be used as a current collector were alternatively stacked onto the pre-stretched Ecoflex rubber and densified by ethanol. The PEDOT/CNS hybrid nanomembrane was transferred onto the densified CNS current collector in an ethanol bath. After densifying, the pre-stretched electrode was coated with a PVA/LiCl gel electrolyte. The 4.5 M PVA/LiCl gel electrolyte was fabricated by mixing PVA (3 g), LiCl (6 g), and deionized water (30 mL) using a stirring bar for 3 h at 90 °C until it became transparent.

##### Supercapacitor assembly

Two symmetric electrodes of a hybrid nanomembrane supercapacitor were separately prepared and then assembled. A solid electrolyte-absorbed nylon panty hose was used as a stretchable separator to avoid electrical shorting between two electrodes during stretching/releasing. Al foils were respectively connected with the CNS current collectors of both electrodes and then the two sandwich structures were sealed by Sil-Poxy glue.

##### Characterization

Surface morphology and height profiles of the hybrid nanomembranes were obtained using SEM (S4700; Hitachi, Tokyo, Japan). Potentiostatic and electrochemical impedance measurements were performed using a Reference 600 potentiostat (Gamry Instruments, Warminster, PA USA). Two-probe uniaxial stretchability changes were measured using a homemade device.

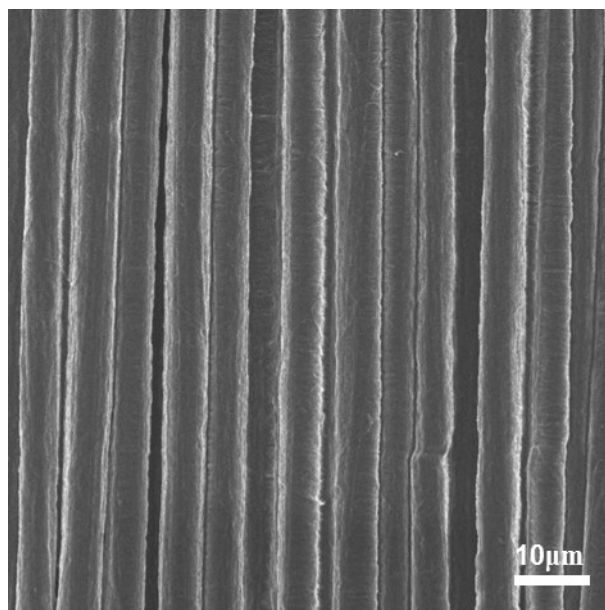

**Fig S1.** The SEM image of uniaxial-wrinkled structure of hybrid nanomembrane after releasing (200% by x-axis direction only).

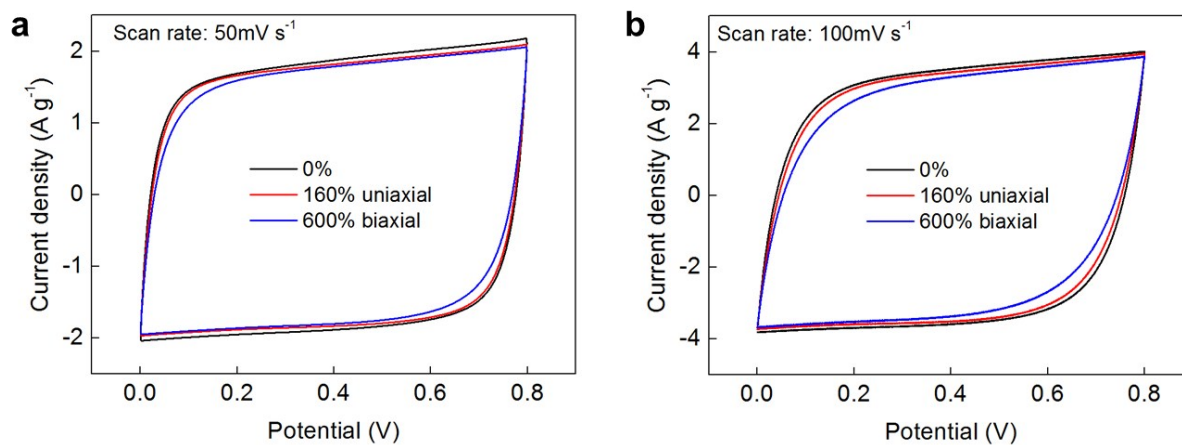

**Fig S2.** a) Cyclic voltammety curves at strains of 0%, 160%, and biaxial 600% with scan rate of  $50 mV s^{-1}$  and b)  $100 mV s^{-1}$ .

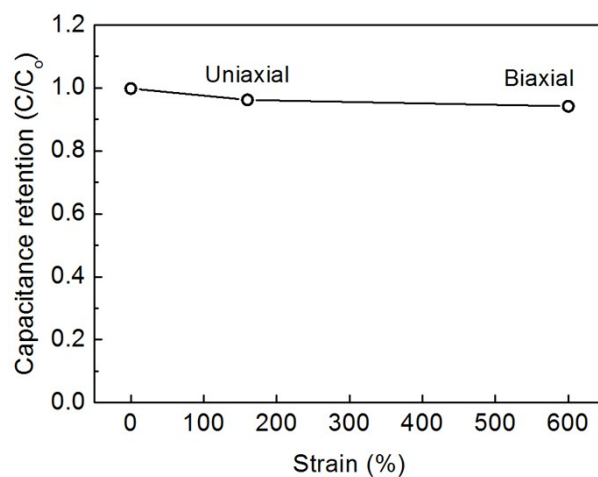

**Fig S3.** Capacitance retention of supercapacitor with increasing strain. (Scan rate: 10 mV s<sup>-1</sup>)

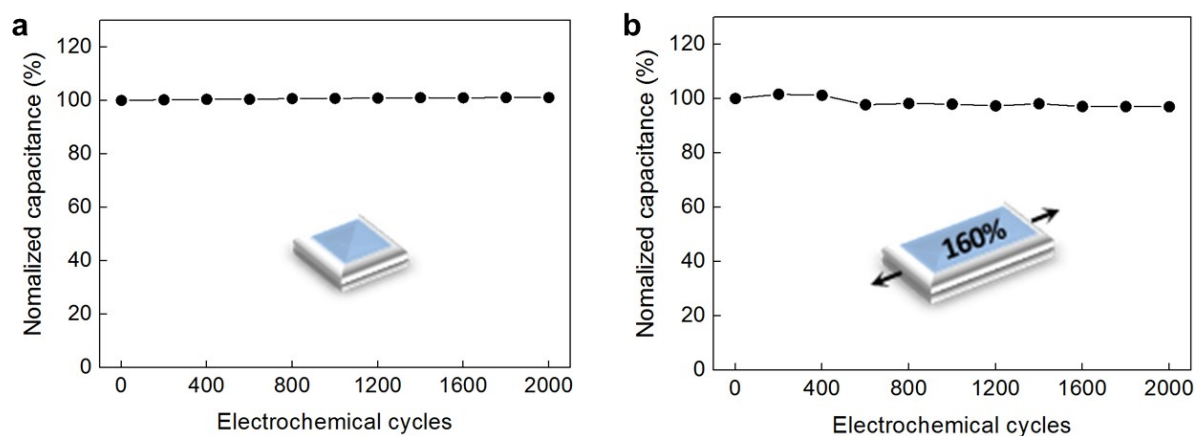

**Fig S4.** a) Dependence of capacitance ratio on electrochemical cycle number with 0% strain and b) 160% strain.

**Table S1.** Summary of our highly stretchable supercapacitor results and comparison with other stretchable pseudocapacitors plotted in Figure 3f.

| Active materials                              | Energy density, $E_{\max}$<br>(Wh kg <sup>-1</sup> ) | Strain (%)  | Ref.        |
|-----------------------------------------------|------------------------------------------------------|-------------|-------------|
| PEDOT/CNS                                     | 7.28                                                 | 0           | ☆ This work |
|                                               | 7.02                                                 | 160         |             |
|                                               | 6.87                                                 | biaxial 600 |             |
| Polypyrrole /Nylon<br>Lycra fabric            | 6.7                                                  | 0           | □ ref.15    |
|                                               | 8.7                                                  | 20          |             |
|                                               | 9.4                                                  | 40          |             |
|                                               | 11.1                                                 | 60          |             |
| Polyaniline /multi-walled<br>carbon nanotubes | 11                                                   | 0           | ○ ref.16    |
|                                               | 10.78                                                | 50          |             |
| MnO <sub>2</sub> /carbon nano<br>particles    | 4.8                                                  | 0           | △ ref.9     |
